# Supplementary material for: Pediatric Tuberculosis in Italian Children: Epidemiological and Clinical Data from the Italian Register of Pediatric Tuberculosis
Source: PubMed Central journal article supplement (PMC4926492; doi:10.3390/ijms17060960), 2016-06-17
Supplement: ijms-17-00960-s001.pdf [file ijms-17-00960-s001.pdf]

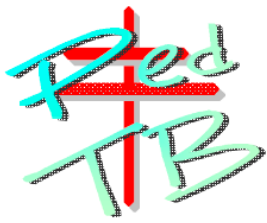

# Italian Register of Paediatric Tuberculosis

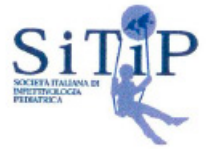

Coordinating centre: Florence \_\_\_\_\_ Rome \_\_\_\_\_

## Enrollment Form

Number \_\_\_\_\_

Hospital: \_\_\_\_\_

Paediatrician \_\_\_\_\_

Signature \_\_\_\_\_

### 1. PERSONAL DATA

Name (initial): \_\_\_\_\_ Surname (initial): \_\_\_\_\_ Sex:  M  F Date of birth: \_\_\_\_ / \_\_\_\_ / \_\_\_\_

Place of birth (State): \_\_\_\_\_ Residence (Province): \_\_\_\_\_

Country of origin (of the child if foreign origin, of the parents if born in Italy): \_\_\_\_\_

If foreign, in Italy from: \_\_\_\_ / \_\_\_\_ / \_\_\_\_

The child is:  adopted  immigrant (even if born in Italy with foreign parents)  Italian

Is a relative of other cases already enrolled? Yes  No

If **yes**, specify: Name (initial): \_\_\_\_\_ Surname (initial): \_\_\_\_\_ Date of birth: \_\_\_\_ / \_\_\_\_ / \_\_\_\_

Form number: \_\_\_\_\_ Relationship: \_\_\_\_\_

### 2. ANAMNESTIC DATA

Date of first observation: \_\_\_\_ / \_\_\_\_ / \_\_\_\_

Date of last visit: \_\_\_\_ / \_\_\_\_ / \_\_\_\_

**Diagnosis:**  latent TB  active TB  uninfected

Date of diagnosis: \_\_\_\_ / \_\_\_\_ / \_\_\_\_

In case of active TB:  pulmonary TB  extrapulmonary TB, specify: \_\_\_\_\_

lymphnodes

central nervous system, specify \_\_\_\_\_

osteoarticular apparatus, specify \_\_\_\_\_

genitourinary system, specify \_\_\_\_\_

other, specify \_\_\_\_\_

Status:  alive  dead  lost to follow-up

Sequelae:  no  yes, specify: \_\_\_\_\_

Date of readmission in community (if active TB) \_\_\_\_ / \_\_\_\_ / \_\_\_\_

If dead: Cause of death: \_\_\_\_\_ Date of death: \_\_\_\_ / \_\_\_\_ / \_\_\_\_

BCG vaccination:  Yes  No  not known

SCAR:  Yes  No  not known

HIV status:  Yes  No  not known

Other diseases: [ ] Yes (specify: \_\_\_\_\_) [ ] NO

Immunosuppressive therapy: [ ] Yes (specify: \_\_\_\_\_) [ ] No

**Reason for investigation:**

[ ] Adoption/immigrant screening [ ] Screening for use of biologic drugs

[ ] Contact with suspected/confirmed source case [ ] Symptomatic

**If symptomatic** (indicate all the signs and symptoms present):

Signs/symptoms: [ ] cough [ ] weight loss [ ] fever [ ] hemoptysis [ ] lymphadenopathy

[ ] night sweats [ ] other, specify: \_\_\_\_\_

**If known contact:**

Type of relation with the source case: [ ] parent [ ] relative [ ] not household [ ] household

[ ] other, specify: \_\_\_\_\_

Contagiousness of the source case: [ ] ZN staining POS [ ] ZN staining NEG, culture POS [ ] both NEG

Source case country of origin: \_\_\_\_\_

Source case treatment: [ ] Yes [ ] No

**Source case susceptibility test (highlight resistences):**

[ ] isoniazid [ ] ethambutol [ ] pyrazinamide [ ] rifampicin [ ] streptomycin [ ] other

**3. DIAGNOSIS**

**Tuberculin Skin Test (TST)**

Date: \_\_\_\_ / \_\_\_\_ / \_\_\_\_ Millimeters of induration: \_\_\_\_\_

Reversion: [ ] Yes [ ] NO [ ] not available

**IGRAs**

**Quantiferon:** Type: [ ] TB Gold [ ] In-Tube

Date: \_\_\_\_ / \_\_\_\_ / \_\_\_\_ [ ] Positive [ ] Negative [ ] Indeterminate

IFN $\gamma$  level after stimulation with: Mitogen: \_\_\_\_\_ UI/mL TB antigens: \_\_\_\_\_ UI/mL

**Elispot:** Date: \_\_\_\_ / \_\_\_\_ / \_\_\_\_

[ ] Positive [ ] Negative [ ] Borderline [ ] Indeterminate

**MICROBIOLOGICAL DATA**

**Sample:** [ ] Gastric aspirate [ ] Sputum [ ] BAL

Date \_\_\_\_ / \_\_\_\_ / \_\_\_\_

Date \_\_\_\_ / \_\_\_\_ / \_\_\_\_

Date \_\_\_\_ / \_\_\_\_ / \_\_\_\_

I sample

II sample

III sample

Culture [ ] P [ ] N [ ] P [ ] N [ ] P [ ] N

ZN staining [ ] P [ ] N [ ] P [ ] N [ ] P [ ] N

PCR [ ] P [ ] N [ ] P [ ] N [ ] P [ ] N

If ZN staining positive, was the test repeated before community readmission? [ ] Yes [ ] No

If Yes, date of negative ZN staining: \_\_\_\_ / \_\_\_\_ / \_\_\_\_

**Other Samples:**

|                            | ZN staining                                           | Colture                                               | PCR                                                   |
|----------------------------|-------------------------------------------------------|-------------------------------------------------------|-------------------------------------------------------|
| Pleural fluid: ___/___/___ | <input type="checkbox"/> P <input type="checkbox"/> N | <input type="checkbox"/> P <input type="checkbox"/> N | <input type="checkbox"/> P <input type="checkbox"/> N |
| CSF: ___/___/___           | <input type="checkbox"/> P <input type="checkbox"/> N | <input type="checkbox"/> P <input type="checkbox"/> N | <input type="checkbox"/> P <input type="checkbox"/> N |
| Lymphnode: ___/___/___     | <input type="checkbox"/> P <input type="checkbox"/> N | <input type="checkbox"/> P <input type="checkbox"/> N | <input type="checkbox"/> P <input type="checkbox"/> N |
| Urine: ___/___/___         | <input type="checkbox"/> P <input type="checkbox"/> N | <input type="checkbox"/> P <input type="checkbox"/> N | <input type="checkbox"/> P <input type="checkbox"/> N |
| Other:___/___/___          | <input type="checkbox"/> P <input type="checkbox"/> N | <input type="checkbox"/> P <input type="checkbox"/> N | <input type="checkbox"/> P <input type="checkbox"/> N |

Specify:(\_\_\_\_\_)

Antimicrobial Susceptibility Test (highlight resistences):  Yes, data \_\_\_/\_\_\_/\_\_\_  No

Specify resistences, if applicable:

isoniazid  ethambutol  pyrazinamide  rifampicin  streptomycine  other \_\_\_\_\_

**Blood tests**

| Data | WB cell<br>×10 <sup>3</sup> /μL | RBC cell<br>×10 <sup>3</sup> /μL | Hb<br>g/dL | E<br>cell/μL | CD4+<br>cell/μL<br>(%) | γ-GT<br>UI/L | ALT<br>UI/L | AST<br>UI/L | PCR<br>mg/dl | 25OHD<br>ng/ml |
|------|---------------------------------|----------------------------------|------------|--------------|------------------------|--------------|-------------|-------------|--------------|----------------|
|      |                                 |                                  |            |              |                        |              |             |             |              |                |
|      |                                 |                                  |            |              |                        |              |             |             |              |                |
|      |                                 |                                  |            |              |                        |              |             |             |              |                |
|      |                                 |                                  |            |              |                        |              |             |             |              |                |

**Radiological tests:**

**Chest X-ray:** date: \_\_\_/\_\_\_/\_\_\_  not performed

negative

consolidation  ilar congestion

calcifications  cavitation

interstitial disease  other, specify \_\_\_\_\_

**Lung-CT** date: \_\_\_/\_\_\_/\_\_\_  not performed

**Contrast:**  Yes  No  negative

consolidation  ilar congestion

calcification  cavitation

miliary TB  atelectasis

other, specify: \_\_\_\_\_

**Other radiological tests:**  Yes, specify: \_\_\_\_\_  No

Date \_\_\_/\_\_\_/\_\_\_ Result: \_\_\_\_\_

**4. Treatment**

[ ] Prophylaxis [ ] Therapy

weight (Kg): \_\_\_\_\_

**Isoniazid** ongoing: [ ] Yes [ ] No

Dosage (mg/kg/day): \_\_\_ from \_\_\_/\_\_\_/\_\_\_ to: \_\_\_/\_\_\_/\_\_\_

Therapy discontinued for: [ ] end of therapy [ ] patient decision [ ] hypertransaminasemia  
[ ] drug resistant TB [ ] rash [ ] other (specify) \_\_\_\_\_**Rifampicin** ongoing: [ ] Yes [ ] No

Dosage (mg/kg/day): \_\_\_ from \_\_\_/\_\_\_/\_\_\_ to: \_\_\_/\_\_\_/\_\_\_

Therapy discontinued for: [ ] end of therapy [ ] patient decision [ ] hypertransaminasemia  
[ ] drug resistant TB [ ] rash [ ] other (specify) \_\_\_\_\_**Pyrazinamide** ongoing: [ ] Yes [ ] No

Dosage (mg/kg/day): \_\_\_ from \_\_\_/\_\_\_/\_\_\_ to: \_\_\_/\_\_\_/\_\_\_

Therapy discontinued for: [ ] end of therapy [ ] patient decision [ ] hypertransaminasemia  
[ ] drug resistant TB [ ] rash [ ] other (specify) \_\_\_\_\_**Ethambutol** ongoing: [ ] Yes [ ] No

Dosage (mg/kg/day): \_\_\_ from \_\_\_/\_\_\_/\_\_\_ to: \_\_\_/\_\_\_/\_\_\_

Therapy discontinued for: [ ] end of therapy [ ] patient decision [ ] hypertransaminasemia  
[ ] drug resistant TB [ ] rash [ ] other (specify) \_\_\_\_\_**Combination of antituberculosis drugs [es. Rifinah (HR), Rifater (HRP)]**

Combination: \_\_\_\_\_ dosage (mg/kg/day): \_\_\_ from \_\_\_/\_\_\_/\_\_\_ to: \_\_\_/\_\_\_/\_\_\_

Therapy discontinued for: [ ] end of therapy [ ] patient decision [ ] hypertransaminasemia  
[ ] drug resistant TB [ ] rash [ ] other (specify) \_\_\_\_\_**Steroid therapy** ongoing: [ ] Yes [ ] No dosage (mg/Kg/day): \_\_\_\_\_ from \_\_\_/\_\_\_/\_\_\_ to \_\_\_/\_\_\_/\_\_\_Therapy discontinued for: [ ] end of therapy [ ] patient decision [ ] hypertransaminasemia  
[ ] drug resistant TB [ ] rash [ ] other (specify) \_\_\_\_\_**Other drugs:**

\_\_\_\_\_ ongoing: [ ] Yes [ ] No

Dosage (mg/kg/day): \_\_\_ from \_\_\_/\_\_\_/\_\_\_ to: \_\_\_/\_\_\_/\_\_\_

Therapy discontinued for: [ ] end of therapy [ ] patient decision [ ] hypertransaminasemia  
[ ] drug resistant TB [ ] rash [ ] other (specify) \_\_\_\_\_

\_\_\_\_\_ ongoing: [ ] Yes [ ] No

Dosage (mg/kg/day): \_\_\_ from \_\_\_/\_\_\_/\_\_\_ to: \_\_\_/\_\_\_/\_\_\_

Therapy discontinued for: [ ] end of therapy [ ] patient decision [ ] hypertransaminasemia  
[ ] drug resistant TB [ ] rash [ ] other (specify) \_\_\_\_\_

\_\_\_\_\_ ongoing: [ ] Yes [ ] No

Dosage (mg/kg/day): \_\_\_ from \_\_\_/\_\_\_/\_\_\_ to: \_\_\_/\_\_\_/\_\_\_

Therapy discontinued for: [ ] end of therapy [ ] patient decision [ ] hypertransaminasemia  
[ ] drug resistant TB [ ] rash [ ] other (specify) \_\_\_\_\_
